# Supplementary material for: Rheotaxis of Larval Zebrafish: Behavioral Study of a Multi-Sensory Process
Source: PubMed Central journal article supplement (PMC4763089; doi:10.3389/fnsys.2016.00014), 2016-02-23

**A**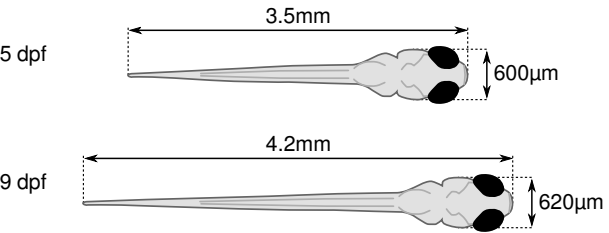**B**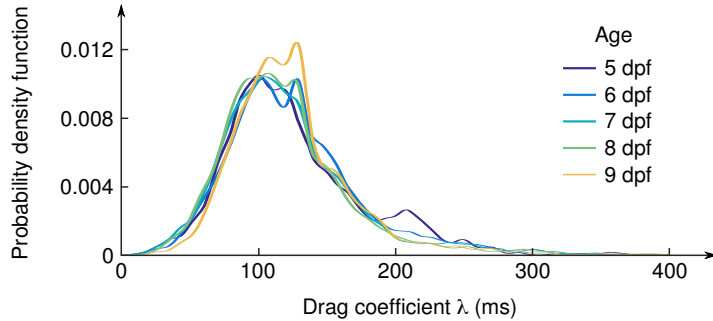

Supplement: SupplementaryFigure1.pdf [file SupplementaryFigure1.pdf]
